# Supplementary material for: Effects of Physical Activity Interventions on Health Outcomes among Older Adults Living with HIV: A Systematic Review and Meta-Analysis
Source: MDPI journal article supplement (doi:10.3390/ijerph19148439), 2022-07-11
Supplement: s1 [file s1]

## Supplementary file

**Table S1. Search Strategies**

| No.           | Search Strategies                                                                                                                                                                                                                                                                                                                                                                                                                                                                              | Results    | Remarks                                 |
|---------------|------------------------------------------------------------------------------------------------------------------------------------------------------------------------------------------------------------------------------------------------------------------------------------------------------------------------------------------------------------------------------------------------------------------------------------------------------------------------------------------------|------------|-----------------------------------------|
| <b>Pubmed</b> |                                                                                                                                                                                                                                                                                                                                                                                                                                                                                                |            |                                         |
| 1             | "HIV"[tiab] OR "Acquired Immunodeficiency syndrome"[tiab] OR "HIV"[mesh] OR "Acquired Immunodeficiency syndrome"[mesh]                                                                                                                                                                                                                                                                                                                                                                         | 387,106    |                                         |
| 2             | "Intervent*"[tiab] OR "Program*"[tiab] OR "Treat*"[tiab] OR "Therap*"[tiab] OR "Program evaluation"[mesh] OR "Therapeutics"[mesh]                                                                                                                                                                                                                                                                                                                                                              | 11,301,695 |                                         |
| 3             | "Physical activity"[tiab] OR "Exercise"[tiab] OR "Exercise"[mesh]                                                                                                                                                                                                                                                                                                                                                                                                                              | 471,760    |                                         |
| 4             | "Randomized controlled trial"[pt] OR "Controlled clinical trial"[pt] OR "Randomized controlled trial*"[tiab] OR "Trial"[tiab] OR "Random*"[tiab] OR "Single blind*"[tiab] OR "Double blind*"[tiab] OR "Triple blind*"[tiab] OR "Randomized Controlled Trials as topic"[mesh] OR "Randomized Controlled Trial"[pt] OR "Controlled Clinical Trials as topic"[mesh] OR "Controlled Clinical Trial"[pt] OR "Random Allocation"[mesh] OR "Single-Blind Method"[mesh] OR "Double-Blind Method"[mesh] | 1,886,966  |                                         |
| 5             | #1 AND #2 AND #3 AND #4                                                                                                                                                                                                                                                                                                                                                                                                                                                                        | 334        |                                         |
| 6             | #1 AND #2 AND #3 AND #4                                                                                                                                                                                                                                                                                                                                                                                                                                                                        | 139        | Filters:<br>English, age<br>+45, human  |
| <b>Total</b>  |                                                                                                                                                                                                                                                                                                                                                                                                                                                                                                | 139        |                                         |
| No.           | Search Strategies                                                                                                                                                                                                                                                                                                                                                                                                                                                                              | Results    | Remarks                                 |
| <b>Embase</b> |                                                                                                                                                                                                                                                                                                                                                                                                                                                                                                |            |                                         |
| 1             | ('hiv':ab,ti OR 'acquired immunodeficiency syndrome':ab,ti) AND ('interventot*':ab,ti OR 'program*':ab,ti OR 'treat*':ab,ti OR 'therap*':ab,ti OR 'program evaluation':ab,ti) AND ('physical activity':ab,ti OR 'exercise':ab,ti) AND ('randomized controlled trial':ab,ti OR 'controlled clinical trial':ab,ti OR 'randomized controlled trial*':ab,ti OR 'trial':ab,ti OR 'random*':ab,ti OR 'single blind*':ab,ti OR 'double blind*':ab,ti OR 'triple blind*':ab,ti)                        | 303        |                                         |
| 2             | ('hiv'/exp OR 'acquired immunodeficiency syndrome'/exp) AND ('interventot*' OR 'program*' OR 'treat*' OR 'therap*' OR 'program evaluation'/exp) AND ('physical activity'/exp OR 'exercise'/exp) AND ('randomized controlled trial'/exp OR 'controlled clinical trial'/exp OR 'randomized controlled trial*' OR 'trial'/exp OR 'random*' OR 'single blind*' OR 'double blind*' OR 'triple blind*')                                                                                              | 197        |                                         |
| 3             | #1 OR #2                                                                                                                                                                                                                                                                                                                                                                                                                                                                                       | 398        |                                         |
| 4             | #3 AND 'human'/de AND ([aged]/lim OR [middle aged]/lim)                                                                                                                                                                                                                                                                                                                                                                                                                                        | 81         | Filters:<br>aged, middle<br>aged, human |
| <b>Total</b>  |                                                                                                                                                                                                                                                                                                                                                                                                                                                                                                | 81         |                                         |
| No.           | Search Strategies                                                                                                                                                                                                                                                                                                                                                                                                                                                                              | Results    | Remarks                                 |
| <b>CINAHL</b> |                                                                                                                                                                                                                                                                                                                                                                                                                                                                                                |            |                                         |
| 1             | AB "HIV" OR "Acquired human immunodeficiency syndrome" OR (MH "HIV infections")                                                                                                                                                                                                                                                                                                                                                                                                                | 101,545    |                                         |

| 2                               | "intervent*" OR "program*" OR "treat*" OR "therap*" OR (MH "program evaluation") OR (MH "nursing interventions") OR (MH "experimental studies") OR (MH "intervention trials")                                                           | 3,028,027 |                                 |
|---------------------------------|-----------------------------------------------------------------------------------------------------------------------------------------------------------------------------------------------------------------------------------------|-----------|---------------------------------|
| 3                               | "physical activity" OR "exercise" OR (MH "exercise") OR (MH "resistance training") OR (MH "therapeutic exercise")                                                                                                                       | 242,337   |                                 |
| 4                               | "randomized controlled trial*" OR "controlled trial*" OR "controlled clinical trial" OR "trial*" OR "random*" OR "single blind*" OR "double blind*" OR "triple blind*" OR (MH "randomized controlled trials") OR (MH "clinical trials") | 710,683   |                                 |
| 5                               | AB #s1 and #s2 and #s3 and #s4                                                                                                                                                                                                          | 92        |                                 |
| 7                               | AB #s1 and #s2 and #s3 and #s4                                                                                                                                                                                                          | 16        | Filters:<br>English, age<br>45+ |
| <b>Total</b>                    |                                                                                                                                                                                                                                         | 16        |                                 |
| No.                             | Search Strategies                                                                                                                                                                                                                       | Results   | Remarks                         |
| <b>Cochrane Library CENTRAL</b> |                                                                                                                                                                                                                                         |           |                                 |
| 1                               | "HIV" OR "Acquired Immunodeficiency syndrome"                                                                                                                                                                                           | 29,933    |                                 |
| 2                               | [Mesh] HIV                                                                                                                                                                                                                              | 3,188     |                                 |
| 3                               | [Mesh] Acquired Immunodeficiency syndrome                                                                                                                                                                                               | 2,005     |                                 |
| 4                               | #1 OR #2 OR #3                                                                                                                                                                                                                          | 29,933    |                                 |
| 5                               | "Intervent*" OR "Program*" OR "Treat*" OR "Therap*" OR "Program evaluation" OR "Therapeutics"                                                                                                                                           | 219,841   |                                 |
| 6                               | [Mesh] program evaluation                                                                                                                                                                                                               | 6,446     |                                 |
| 7                               | [Mesh] therapeutics                                                                                                                                                                                                                     | 318,868   |                                 |
| 8                               | #5 OR #6 OR #7                                                                                                                                                                                                                          | 489,951   |                                 |
| 9                               | "Physical activity" OR "Exercise"                                                                                                                                                                                                       | 127,783   |                                 |
| 10                              | [Mesh] Exercise                                                                                                                                                                                                                         | 26,876    |                                 |
| 11                              | #9 OR #10                                                                                                                                                                                                                               | 130,778   |                                 |
| 12                              | "Randomized controlled trial*" OR "Trial" OR "Random*" OR "Single blind*" OR "Double blind*" OR "Triple blind"                                                                                                                          | 1,426,624 |                                 |
| 13                              | [Mesh] Randomized Controlled Trials as Topic                                                                                                                                                                                            | 15,075    |                                 |
| 14                              | [Mesh] Controlled Clinical Trials as Topic                                                                                                                                                                                              | 15,229    |                                 |
| 15                              | [Mesh] Random Allocation                                                                                                                                                                                                                | 20,654    |                                 |
| 16                              | [Mesh] Single-Blind Method                                                                                                                                                                                                              | 22,262    |                                 |
| 17                              | [Mesh] Double-Blind Method                                                                                                                                                                                                              | 143,967   |                                 |
| 18                              | #12 OR #13 OR #14 OR #15 OR #16 OR #17                                                                                                                                                                                                  | 1,426,881 |                                 |
| 19                              | #4 AND #8 AND #11 AND #18                                                                                                                                                                                                               | 385       |                                 |
| 20                              | #4 AND #8 AND #11 AND #18                                                                                                                                                                                                               | 215       |                                 |
| <b>Total</b>                    |                                                                                                                                                                                                                                         | 215       |                                 |
